# Supplementary material
Source: publisher figshare collection journal article supplement (https://tandf.figshare.com/ndownloader/files/3675831)
Supplement: Supplementary file 1 [file 3675831]

## Sheet: Table S1
Table S1. Unadjusted cell mixture results for Artery: top 100 differentially methylated CpG loci based on lowest P-value
CpG Name	Coefficient	P-value	Relation to CpG Island	Infinium Type	Gene Name
cg26587014	0.157665	4.68551e-08	S_Shelf	II
cg02197019	0.115902	1.43214e-07	N_Shore	II
cg21535156	-0.122294	1.57518e-07	S_Shore	I	MICALL2
cg03569637	0.134736	2.08143e-07	OpenSea	II	LOC100233209;FAM113B
cg04548722	0.116376	2.66684e-07	OpenSea	II	LOC440335;LOC440335;LOC440335
cg19223106	-0.202187	2.7574e-07	Island	I	RPS5
cg10510779	0.168962	3.85292e-07	OpenSea	II	MTMR12
cg00171459	0.171937	3.90515e-07	S_Shore	II	FBXL18
cg13021192	-0.260181	4.81998e-07	Island	I	CTSZ;CTSZ
cg27540799	0.225776	4.82581e-07	S_Shore	II	RER1
cg26095478	0.168272	4.87008e-07	S_Shelf	II
cg18760920	-0.110452	5.41808e-07	Island	II
cg16053064	0.205868	5.88401e-07	OpenSea	II	KCNAB2;KCNAB2
cg04382250	0.106713	6.8088e-07	OpenSea	II	C20orf196
cg09538401	0.146149	7.06097e-07	S_Shore	II	C11orf93;C11orf92
cg22876894	-0.269332	8.05226e-07	N_Shore	II
cg00505606	0.12614	8.28567e-07	N_Shelf	I	TP73;TP73;TP73;TP73
cg05788994	-0.115394	8.62703e-07	Island	I	CHD9
cg24005340	-0.0903318	9.09502e-07	Island	II	PANK3
cg24369048	0.112719	9.18613e-07	S_Shelf	II	CCDC97
cg14337526	-0.124407	1.19398e-06	Island	I	RAP2A;RAP2A
cg17002428	0.129136	1.22646e-06	S_Shelf	II	DFFB
cg08894891	0.118193	1.37648e-06	Island	I	HOMER3;HOMER3;HOMER3;HOMER3;HOMER3
cg07661246	0.16673	1.42021e-06	S_Shore	II	APOA4
cg24547137	0.095896	1.4225e-06	Island	I	MIR1180;B9D1
cg17073323	0.192367	1.4832e-06	OpenSea	II	RPL32;RPL32;RPL32
cg27421105	-0.0995354	1.53974e-06	N_Shore	I	MARCH2;MARCH2;MARCH2
cg24407859	-0.122437	1.62795e-06	Island	I
cg24152297	0.113489	1.64117e-06	S_Shelf	II	PAQR6;PAQR6
cg23063905	0.124342	1.7416e-06	OpenSea	I	RAPGEF3;RAPGEF3;RAPGEF3
cg06624244	0.106989	1.81169e-06	OpenSea	II	C1orf64
cg19476741	0.106097	1.90852e-06	S_Shore	I	FAM20C
cg06123940	0.161461	1.92382e-06	N_Shore	II	RNF125
cg13518988	-0.119317	1.99387e-06	Island	I	GRB2;GRB2
cg00238391	0.126827	2.0217e-06	S_Shelf	II
cg00072407	0.13748	2.03406e-06	N_Shore	II	HOOK2;HOOK2
cg15849446	0.148411	2.0665e-06	OpenSea	II
cg18603276	-0.147967	2.15471e-06	Island	I	HES7;HES7
cg26706961	0.263776	2.22012e-06	OpenSea	II
cg15091123	0.149648	2.56307e-06	N_Shelf	II	LRRC43;LRRC43
cg12774429	0.141655	2.60792e-06	S_Shore	II	CHD8;CHD8;SUPT16H
cg06848775	0.130058	2.78063e-06	OpenSea	II	MARVELD3
cg18274619	-0.109863	2.8422e-06	OpenSea	I	MGLL;MGLL
cg03991533	0.0992079	2.8559e-06	S_Shelf	II	SEC24A
cg22797700	0.0772019	2.90357e-06	N_Shelf	I
cg07715909	0.0640669	2.98292e-06	OpenSea	II	HCCA2
cg05363350	0.123151	3.00166e-06	OpenSea	II	RAD54L;RAD54L
cg03998119	0.210296	3.01101e-06	Island	II	PTPN21
cg10198271	-0.23041	3.05153e-06	Island	I	RBM38;RBM38
cg09107055	0.155466	3.22667e-06	OpenSea	II	C16orf87
cg15497729	0.126068	3.23223e-06	OpenSea	II	SCMH1;SCMH1
cg05258261	-0.125288	3.34171e-06	Island	I	SPSB4
cg26267340	-0.115805	3.37513e-06	Island	I	NRG1
cg24136385	0.121691	3.39867e-06	S_Shore	I	C7orf50;C7orf50;C7orf50
cg26647929	-0.154586	3.49486e-06	OpenSea	I
cg16581532	-0.116234	3.59149e-06	Island	I	RBM4B
cg07734293	0.132044	3.61559e-06	N_Shelf	II
cg06815419	-0.0850964	3.68474e-06	Island	I	BTBD1;BTBD1
cg18436758	-0.138457	3.68687e-06	Island	I	HP1BP3
cg14606129	0.251731	3.77251e-06	OpenSea	II
cg15703970	0.0810915	3.7763e-06	S_Shore	I	ELFN1
cg01015899	0.0943526	3.89465e-06	OpenSea	I	PXN;PXN;PXN
cg15100947	0.138389	4.0977e-06	OpenSea	II	ACOT7;ACOT7;ACOT7;ACOT7
cg25261059	-0.137538	4.1419e-06	Island	I	ETHE1
cg16931825	-0.158843	4.29057e-06	Island	I	TCEA2;TCEA2;TCEA2
cg21989399	-0.113245	4.35366e-06	Island	II	TMEM14A
cg02918483	-0.0680765	4.37112e-06	Island	I	FAM175A
cg06045062	-0.112651	4.4159e-06	Island	I	ADH5
cg26886427	-0.0927265	4.44855e-06	Island	I	C19orf52;YIPF2
cg24353706	0.145815	4.46621e-06	N_Shore	II	SLC20A2
cg14993712	-0.128858	4.54642e-06	Island	I	ZC3HAV1L
cg19098793	-0.115803	4.67406e-06	Island	I	KIAA1908;KIAA1908;PSMG3;KIAA1908;PSMG3
cg12291523	0.108094	4.73624e-06	OpenSea	I
cg05700333	-0.192601	4.75721e-06	Island	I	RAD50;RAD50;RAD50;RAD50
cg24011261	-0.109649	5.57523e-06	S_Shore	I	GPX1;GPX1
cg16087060	0.113395	5.73329e-06	N_Shelf	II	RAI1
cg13318091	0.0799747	5.81479e-06	Island	I	TRIM35
cg26327118	-0.235857	6.15106e-06	S_Shore	I	KIF6
cg06649044	-0.128739	6.17641e-06	N_Shore	I	SOX18;SOX18
cg12581354	0.115564	6.37703e-06	S_Shore	II	UHRF1BP1L;UHRF1BP1L
cg02996291	-0.103655	6.47163e-06	N_Shore	I	KLC2;RAB1B;KLC2;KLC2;KLC2
cg08008254	0.115985	6.56963e-06	OpenSea	II	ADORA2B
cg08571764	0.169535	6.57189e-06	OpenSea	II
cg00128188	-0.114773	6.62517e-06	Island	I	IDI1
cg13582500	0.0907631	6.64188e-06	S_Shore	II	ZDHHC5
cg01494890	-0.0869466	6.71196e-06	Island	I	KCNH2;KCNH2
cg26430167	-0.133695	6.71661e-06	N_Shore	II
cg00871980	-0.10101	6.78223e-06	OpenSea	II	ITGB5
cg23274123	-0.15988	6.80497e-06	Island	I	C1orf96
cg10324640	0.156176	6.8303e-06	OpenSea	II	CDK3
cg27399414	-0.166337	6.89658e-06	Island	I	CLSTN1;CLSTN1
cg13275176	-0.214943	7.05396e-06	Island	I	SEMA4C
cg00714740	-0.120741	7.32712e-06	Island	II
cg23368579	-0.101376	7.37017e-06	S_Shelf	II
cg09430954	0.101418	7.49121e-06	Island	I
cg22961275	-0.162653	7.50015e-06	Island	I	SELV;SELV
cg01723761	0.104758	7.51033e-06	S_Shore	I	A2LD1
cg24718163	-0.0867323	7.61386e-06	Island	I	OSBPL11
cg12132029	-0.146979	7.66453e-06	Island	I	ZNF653
cg14532426	-0.100859	7.75706e-06	Island	I	HUNK;HUNK

## Sheet: Table S2
Table S2. Adjusted cell mixture results for Artery: top 100 differentially methylated CpG loci based on lowest P-value
CpG Name	Coefficient	P-value	Relation to CpG Island	Infinium Type	Gene Name
cg11170044	-0.01079	3.81491e-07	OpenSea	II
cg23954655	0.00991924	9.5466e-07	OpenSea	II	STK24
cg06896987	0.0150877	1.24083e-06	N_Shore	II
cg25951430	0.00940774	4.41524e-06	N_Shore	II	SLC43A3;SLC43A3;SLC43A3
cg02197019	0.0104918	5.14173e-06	N_Shore	II
cg26587014	0.0107833	5.67024e-06	S_Shelf	II
cg07715909	0.00804723	7.15578e-06	OpenSea	II	HCCA2
cg24503109	-0.0136706	7.29972e-06	Island	II	KIAA1751
cg09992883	0.000187763	8.41685e-06	Island	I
cg04266383	0.00834953	1.01203e-05	S_Shelf	I	MCM4;MCM4
cg13870520	0.0113201	1.05012e-05	N_Shelf	II	SCARB2
cg11674844	0.000247224	1.06534e-05	Island	I	GPN2
cg26619047	0.000168485	1.06704e-05	Island	I	CXXC5
cg24005340	-0.000748616	1.10762e-05	Island	II	PANK3
cg15703970	0.00485046	1.1523e-05	S_Shore	I	ELFN1
cg18760920	-0.000697237	1.29143e-05	Island	II
cg00171459	0.0140002	1.34835e-05	S_Shore	II	FBXL18
cg09157427	-0.000491934	1.41178e-05	Island	I
cg20559736	0.0102491	1.55427e-05	OpenSea	II	CEACAM19;CEACAM19
cg04548722	0.00978052	1.62219e-05	OpenSea	II	LOC440335;LOC440335;LOC440335
cg20592017	0.0121142	1.63316e-05	OpenSea	I
cg02868976	0.00869472	1.82255e-05	N_Shore	II	ITSN2;ITSN2;ITSN2
cg27447219	0.0076223	1.83085e-05	OpenSea	I	STK24;STK24
cg00107046	0.00749743	1.8574e-05	S_Shore	II	EPHA2
cg13793354	-0.00257649	1.90862e-05	N_Shore	II	MCCC2
cg02771299	-0.00852865	1.97157e-05	OpenSea	II	ITPR3
cg04090794	0.0192876	2.01334e-05	OpenSea	II	HSP90B3P
cg24994360	0.00840735	2.01355e-05	OpenSea	II
cg25741215	-0.000600536	2.0824e-05	Island	I
cg05208416	0.00455899	2.12416e-05	S_Shelf	I	LOC100130872;LOC100130872-SPON2
cg21557451	0.00363918	2.1311e-05	S_Shelf	I	FUT5
cg02918483	-0.000563049	2.33223e-05	Island	I	FAM175A
cg21989399	-0.00151578	2.33958e-05	Island	II	TMEM14A
cg09510269	0.00449227	2.34463e-05	N_Shore	I	HCG18;HCG18
cg00993710	0.00417225	2.49938e-05	N_Shelf	I	ATG9B
cg06443973	-0.00337608	2.51648e-05	Island	I	KIAA1033
cg13873029	-0.0144584	2.55688e-05	OpenSea	II
cg06055730	0.00548847	2.62826e-05	S_Shelf	I
cg00871980	-0.00401226	2.64161e-05	OpenSea	II	ITGB5
cg01015899	0.00386238	2.71906e-05	OpenSea	I	PXN;PXN;PXN
cg21430685	0.00537712	2.7434e-05	OpenSea	II
cg03569637	0.00289003	2.80885e-05	OpenSea	II	LOC100233209;FAM113B
cg25354716	0.0122537	2.86414e-05	S_Shelf	II	CRTAP
cg07544244	-0.000280451	2.90249e-05	Island	I	NR4A1;NR4A1
cg25206705	-0.00191576	2.91385e-05	Island	I	ABR;ABR
cg10300729	0.0148592	2.97052e-05	S_Shelf	II	REEP3
cg18393023	-0.00227513	3.20399e-05	OpenSea	II	SERPIND1;PI4KA
cg05824225	-0.0012701	3.30709e-05	Island	II	CST3
cg26107333	-0.00522168	3.35755e-05	Island	II	TSPAN9;TSPAN9
cg27061477	0.00657445	3.39622e-05	N_Shelf	I
cg02273797	0.00786821	3.45277e-05	OpenSea	II
cg23321010	-0.00807186	3.5832e-05	OpenSea	II
cg16322666	0.00532512	3.69159e-05	N_Shore	I	RNF8;RNF8
cg03446203	-0.00714672	3.71423e-05	N_Shore	I	C6orf48;SNORD48;C6orf48
cg07220152	0.00800032	3.85093e-05	OpenSea	II
cg23845609	0.00947577	3.9624e-05	N_Shore	II	FAM180B
cg04382250	0.0112506	3.97844e-05	OpenSea	II	C20orf196
cg15144793	-0.000405073	3.98944e-05	Island	II	SH3BP4
cg07661246	0.0054079	4.0375e-05	S_Shore	II	APOA4
cg25103161	0.00689682	4.09818e-05	N_Shore	II	MGAT4B;MGAT4B
cg19476741	0.00815576	4.10609e-05	S_Shore	I	FAM20C
cg19538885	-0.000571584	4.15009e-05	Island	I	PRKCE
cg20749059	0.0100634	4.15495e-05	OpenSea	II	ARHGEF3;SPATA12
cg06624244	0.00902512	4.1848e-05	OpenSea	II	C1orf64
cg05499262	0.000212722	4.43018e-05	Island	I	EPHA4
cg12382846	0.00704178	4.5424e-05	S_Shelf	I	LAMA5
cg08319905	0.00840721	4.55119e-05	Island	II	PPFIA3
cg26095478	0.00841555	4.57206e-05	S_Shelf	II
cg27421105	-0.0119296	4.68174e-05	N_Shore	I	MARCH2;MARCH2;MARCH2
cg00332212	-0.000792181	4.79981e-05	Island	I	OCIAD2;OCIAD2;OCIAD2;OCIAD2
cg03687587	-0.000751624	4.85462e-05	Island	II	CADM3;CADM3
cg05363350	0.00775222	4.90896e-05	OpenSea	II	RAD54L;RAD54L
cg14378925	0.00754093	4.95896e-05	OpenSea	II	EHD1
cg10334916	-0.00200756	4.99136e-05	N_Shore	I	RNPEPL1
cg12176426	-0.00114334	5.14029e-05	Island	II	TAF3
cg22516651	0.000112962	5.24803e-05	Island	I	SCN1B;SCN1B;SCN1B;SCN1B
cg09626984	-0.0279727	5.32677e-05	Island	II	GATA4
cg00714740	-0.00205856	5.46399e-05	Island	II
cg23063905	0.00484854	5.5558e-05	OpenSea	I	RAPGEF3;RAPGEF3;RAPGEF3
cg00207921	0.0114337	5.69183e-05	Island	II
cg22152500	0.00611751	5.72368e-05	OpenSea	I
cg03913456	-0.0108324	5.77844e-05	N_Shore	I	NCAPH
cg07398352	-0.00995347	5.82892e-05	OpenSea	II
cg21535156	-0.00622049	5.88538e-05	S_Shore	I	MICALL2
cg16651877	0.0101482	6.15518e-05	N_Shelf	II	BTBD19
cg25122941	-0.000218955	6.19154e-05	Island	II	VPS39
cg07734293	0.0163716	6.23446e-05	N_Shelf	II
cg07235652	-0.00170407	6.28402e-05	Island	I	ALKBH2;ALKBH2;ALKBH2;ALKBH2;ALKBH2
cg09447808	0.00940329	6.38001e-05	S_Shore	II	SLC39A8;SLC39A8;SLC39A8
cg12437254	0.00826355	6.49434e-05	S_Shelf	II	PSMA1
cg23000808	-0.00212205	6.51878e-05	Island	II	LINGO3
cg08805160	-0.00046371	6.54393e-05	Island	I	RPL27A;SNORA3
cg25734913	0.00333594	6.61958e-05	Island	II
cg24136385	0.0116886	6.68678e-05	S_Shore	I	C7orf50;C7orf50;C7orf50
cg19107641	-0.00308369	6.72628e-05	N_Shore	II
cg07983907	0.00662024	6.91219e-05	N_Shelf	I	ZC3H18
cg13067649	-0.00317687	6.96414e-05	OpenSea	II	COL6A6
cg00505606	0.00559421	7.04114e-05	N_Shelf	I	TP73;TP73;TP73;TP73
cg16564534	-0.00929322	7.08168e-05	OpenSea	I	MRPL11;MRPL11;MRPL11
cg02239209	-0.00167003	7.1253e-05	Island	I	C15orf27

## Sheet: Table S3
Table S3. Unadjusted cell mixture results for Placenta: top 100 differentially methylated CpG loci based on lowest P-value
CpG Name	Coefficient	P-value	Relation to CpG Island	Infinium Type	Gene Name
cg26390526	0.330423	2.11e-07	OpenSea	II	FLG
cg03857453	0.312437	3.03e-07	OpenSea	II	NR3C1;NR3C1;NR3C1;NR3C1;NR3C1;NR3C1;NR3C1
cg08215036	0.286869	7.44e-07	OpenSea	II
cg14383062	-0.126739	9.5e-07	Island	II	TBCD
cg05922384	0.296362	1.09e-06	OpenSea	II	CFH
cg11480029	0.250289	1.13e-06	OpenSea	II	OR9A2
cg17942553	-0.142604	1.83e-06	S_Shore	II	ARNT;ARNT;ARNT
cg14560775	0.263065	2.11e-06	OpenSea	II	OR7A10
cg04050696	0.350058	2.26e-06	OpenSea	II
cg20554753	0.207829	2.45e-06	OpenSea	II
cg14087209	0.214067	2.47e-06	OpenSea	II
cg03274669	0.266734	2.54e-06	OpenSea	II
cg20832559	0.219419	2.9e-06	OpenSea	II	CRYBG3
cg24392939	0.303886	2.96e-06	OpenSea	II
cg25271841	0.257594	4.18e-06	OpenSea	II	AKR1D1
cg20841588	0.212011	4.37e-06	OpenSea	II	MIR1246
cg18734591	-0.155172	4.53e-06	S_Shore	II	WDR60
cg24678148	0.259542	4.63e-06	OpenSea	II
cg23761824	0.182998	4.76e-06	OpenSea	II	C2orf16
cg21002651	-0.199811	5.73e-06	OpenSea	II	CASP1;CASP1;CASP1;CASP1;CASP1
cg11046673	0.130218	6.22e-06	OpenSea	II	MED12L;P2RY13
cg05761971	0.30238	6.31e-06	OpenSea	II	FAM82A1;FAM82A1;FAM82A1;FAM82A1;FAM82A1;FAM82A1
cg08177332	0.19549	7.83e-06	OpenSea	II
cg03173942	0.231287	7.98e-06	OpenSea	II	RYBP
cg14382224	0.162631	8.03e-06	S_Shore	II	ASTN2;ASTN2;ASTN2
cg19234089	-0.130997	8.04e-06	OpenSea	II	SART1
cg19393605	-0.103711	8.68e-06	S_Shore	I	ARL2
cg05607053	0.348643	8.87e-06	OpenSea	II	SOX6;SOX6;SOX6;SOX6
cg14529201	0.348653	9.03e-06	OpenSea	II
cg10456628	-0.123012	9.31e-06	S_Shelf	II
cg27268104	0.252401	9.66e-06	OpenSea	II
cg04525892	0.221365	9.67e-06	OpenSea	II	MSRB3;MSRB3
cg00231754	0.336563	9.7e-06	OpenSea	II	FAM82A1;FAM82A1;FAM82A1;FAM82A1
cg23000950	0.209216	9.72e-06	OpenSea	II	FBN1
cg19688752	0.240446	9.75e-06	OpenSea	II	C6orf204;C6orf204
cg02526838	0.288681	9.9e-06	OpenSea	II
cg05888433	0.184906	1.02e-05	OpenSea	II	OR11H4
cg17196933	0.271638	1.03e-05	OpenSea	II	LOC399959;BLID
cg06378107	0.283122	1.03e-05	OpenSea	II	TMEM133
cg07816653	0.208718	1.03e-05	Island	II
cg25152909	0.174533	1.05e-05	OpenSea	II	C5orf41
cg15940800	0.272765	1.05e-05	OpenSea	II	ACTA2
cg22813542	0.181434	1.05e-05	OpenSea	II	LOC399959;BLID
cg18874294	-0.150652	1.14e-05	OpenSea	II	ZPBP;ZPBP
cg06233186	0.354979	1.14e-05	OpenSea	II
cg13447818	0.309176	1.14e-05	OpenSea	II	FLG
cg16405211	0.258155	1.19e-05	OpenSea	II	CNTNAP2
cg25940202	-0.155151	1.22e-05	OpenSea	II
cg08473324	0.339625	1.25e-05	S_Shelf	II	CHMP2B
cg23920603	0.23665	1.26e-05	OpenSea	II
cg19854901	-0.166585	1.28e-05	N_Shore	II	RASSF1;RASSF1;RASSF1;RASSF1
cg25396637	0.239478	1.36e-05	S_Shelf	II	KLHL7;KLHL7
cg26764579	0.203565	1.36e-05	OpenSea	II	OSTN
cg04923194	0.157224	1.39e-05	OpenSea	II	DLG2;DLG2;DLG2;DLG2
cg05694052	0.278891	1.42e-05	OpenSea	II	OR52E4
cg08890976	-0.133741	1.44e-05	S_Shore	II	UHRF1BP1L;UHRF1BP1L
cg26663560	0.313269	1.5e-05	OpenSea	II	DTWD1;DTWD1
cg05606754	0.286759	1.51e-05	OpenSea	II
cg13917099	0.235765	1.51e-05	OpenSea	II	SND1
cg00681365	0.233866	1.52e-05	S_Shelf	II	LPHN3
cg06228407	0.261145	1.53e-05	OpenSea	II
cg02551095	0.139498	1.55e-05	OpenSea	II
cg08130520	0.161711	1.56e-05	N_Shore	II	ABCC6P1
cg23472171	-0.094761	1.56e-05	Island	I	POM121C
cg14620184	0.237401	1.58e-05	OpenSea	II	ALK
cg21204870	0.307193	1.59e-05	OpenSea	II	PALM2;PALM2
cg03157922	0.320361	1.6e-05	OpenSea	II	DDX10
cg20691727	0.27634	1.61e-05	OpenSea	II	OR1S1
cg13427473	0.326946	1.62e-05	OpenSea	II
cg08235557	-0.155836	1.63e-05	S_Shelf	II
cg22774472	-0.162285	1.64e-05	OpenSea	II	COL5A2
cg03173975	-0.102811	1.66e-05	N_Shore	II	MTG1
cg23400222	0.206905	1.66e-05	OpenSea	II
cg25221857	0.2219	1.71e-05	OpenSea	II	PPP2R3A
cg08635822	0.261386	1.73e-05	OpenSea	II
cg26817935	-0.206623	1.75e-05	OpenSea	II	PDE4D;PDE4D;PDE4D
cg04206724	-0.12127	1.76e-05	OpenSea	II	DEXI
cg19978728	0.280612	1.77e-05	OpenSea	II	CADM1;CADM1
cg17563336	-0.241025	1.84e-05	OpenSea	II	PDE4D;PDE4D;PDE4D
cg18458131	0.186725	1.89e-05	N_Shore	II	TSPYL5;TSPYL5
cg06179749	-0.0846537	1.93e-05	OpenSea	I	PHC2;PHC2
cg24137472	0.232901	2.04e-05	OpenSea	II	OR11H4
cg07188551	0.247003	2.04e-05	OpenSea	II	PHIP
cg14139051	0.262259	2.08e-05	OpenSea	II	CDK14
cg07699084	-0.212181	2.12e-05	S_Shelf	II
cg14566589	-0.117775	2.15e-05	OpenSea	I	MLL3
cg00653025	-0.150732	2.22e-05	N_Shelf	II
cg15114431	0.226957	2.26e-05	OpenSea	II
cg20150904	-0.109299	2.29e-05	N_Shore	II	DUSP3
cg05863023	0.203663	2.32e-05	OpenSea	II	PID1;PID1
cg11933019	0.265807	2.34e-05	OpenSea	II	CNTN5;CNTN5
cg06852076	-0.108987	2.36e-05	S_Shore	II	DERL3;DERL3;DERL3
cg24396875	0.164919	2.41e-05	OpenSea	II	PMS1;PMS1;PMS1
cg25876057	0.160056	2.41e-05	OpenSea	II	LOC643677
cg05751616	-0.107693	2.42e-05	S_Shelf	II	IFFO1;IFFO1;IFFO1
cg22677048	0.23512	2.45e-05	OpenSea	II	OR51B2;OR51B2
cg12621546	0.297967	2.46e-05	OpenSea	II
cg21888923	0.236895	2.47e-05	OpenSea	II	PHF21A;PHF21A
cg20194982	0.322163	2.47e-05	OpenSea	II	SLC24A3
cg24274211	0.253824	2.49e-05	OpenSea	II

## Sheet: Table S4
Table S4. Adjusted cell mixture results for Placenta: top 100 differentially methylated CpG loci based on lowest P-value
CpG Name	Coefficient	P-value	Relation to CpG Island	Infinium Type	Gene Name
cg12825509	0.023729	5.76e-08	OpenSea	II	TRA2B
cg20554753	0.0230542	6.71e-08	OpenSea	II
cg23439277	0.0252755	7.83e-08	OpenSea	II	PLCE1
cg21055948	0.0196902	1.18e-07	OpenSea	II	CD36
cg08860346	0.0245614	1.59e-07	OpenSea	II
cg14352586	-0.0140261	2.41e-07	OpenSea	I	GALNT12
cg09044290	0.0221268	5.16e-07	OpenSea	II	LYPD6
cg14087209	0.0344147	5.78e-07	OpenSea	II
cg04840339	0.027224	8.23e-07	OpenSea	II	TRDN
cg21021629	0.0186736	9.19e-07	OpenSea	II	NRIP1
cg23737809	-0.0149387	9.55e-07	OpenSea	I	C7orf23
cg22818762	0.0211552	9.66e-07	OpenSea	II	MARCH1
cg01974100	0.000706044	1.1e-06	N_Shore	I	FAM179B;KLHL28;KLHL28
cg18577167	0.0218823	1.12e-06	OpenSea	II
cg10453481	-0.0121332	1.15e-06	OpenSea	II	TCTN1;TCTN1;HVCN1;HVCN1;TCTN1
cg22677048	0.0311167	1.19e-06	OpenSea	II	OR51B2;OR51B2
cg19811231	0.022428	1.21e-06	OpenSea	II	TRAT1
cg16105415	0.023793	1.55e-06	N_Shore	II
cg24941292	-0.00703462	1.69e-06	OpenSea	II
cg10029905	0.0271093	1.82e-06	OpenSea	II	SLC2A2
cg22852276	0.000744354	1.88e-06	Island	II	RBL1;RBL1
cg13100118	-0.0162553	1.89e-06	OpenSea	I	CAPZB
cg05199503	-0.0245115	2.01e-06	Island	I
cg25152909	0.0180447	2.04e-06	OpenSea	II	C5orf41
cg26390526	0.0340325	2.05e-06	OpenSea	II	FLG
cg24444447	0.0202246	2.21e-06	OpenSea	II
cg06526042	-0.0126666	2.24e-06	N_Shelf	I
cg11046673	0.0146519	2.25e-06	OpenSea	II	MED12L;P2RY13
cg23920603	0.021945	2.36e-06	OpenSea	II
cg08085909	0.0206573	2.38e-06	OpenSea	II	FERMT2;FERMT2;FERMT2
cg05694052	0.0281354	2.48e-06	OpenSea	II	OR52E4
cg18737349	0.0220802	2.52e-06	OpenSea	II
cg14981819	0.0185355	2.68e-06	OpenSea	II
cg12804693	0.0275316	2.7e-06	OpenSea	II	FAT3
cg22374567	0.00055912	2.78e-06	Island	II	USP21;USP21
cg27268104	0.0167129	2.88e-06	OpenSea	II
cg24808111	-0.016532	2.97e-06	N_Shelf	II
cg21204870	0.0230757	3.04e-06	OpenSea	II	PALM2;PALM2
cg14477780	-0.0141854	3.1e-06	OpenSea	I	FAM149A;FAM149A
cg24883742	0.0218248	3.18e-06	OpenSea	II	C6
cg22374268	0.0195013	3.21e-06	OpenSea	II	CARD18
cg00927364	0.0218988	3.22e-06	OpenSea	II
cg20391321	0.0230467	3.24e-06	OpenSea	II
cg05556613	0.000785246	3.41e-06	Island	II
cg16405211	0.0332092	4.44e-06	OpenSea	II	CNTNAP2
cg16172408	0.0234167	4.61e-06	Island	II	ZNF804B
cg14620184	0.0228338	4.79e-06	OpenSea	II	ALK
cg13153865	0.00298814	4.84e-06	N_Shore	II	OSGIN2;OSGIN2;OSGIN2
cg22488081	0.0253047	5e-06	OpenSea	II
cg25354814	0.0151387	5.2e-06	OpenSea	II	C2CD3
cg00344308	0.0170035	5.34e-06	OpenSea	II
cg16995606	0.016606	5.36e-06	OpenSea	II	TNFSF13B;TNFSF13B
cg24678148	0.0246536	5.38e-06	OpenSea	II
cg13899293	0.0137304	5.4e-06	OpenSea	II	FRAS1;FRAS1
cg11933019	0.023585	5.76e-06	OpenSea	II	CNTN5;CNTN5
cg13305246	0.016118	5.79e-06	S_Shelf	II	SAMD13;SAMD13;SAMD13
cg07152120	0.0218384	6.01e-06	OpenSea	II	SND1
cg17563336	-0.00880472	6.34e-06	OpenSea	II	PDE4D;PDE4D;PDE4D
cg00681365	0.0235641	6.37e-06	S_Shelf	II	LPHN3
cg11016764	-0.00919915	6.48e-06	OpenSea	I	STK10
cg05607053	0.0253672	6.51e-06	OpenSea	II	SOX6;SOX6;SOX6;SOX6
cg08306955	0.0163387	6.71e-06	N_Shore	II	CMAH;CMAH
cg17786255	0.0146936	6.87e-06	OpenSea	II	SGMS2;SGMS2;SGMS2
cg27262870	0.0205592	6.89e-06	OpenSea	II	LOC399959;BLID;BLID
cg21176603	-0.0143813	7.23e-06	OpenSea	I	FSTL4
cg21509457	-0.0137149	7.38e-06	OpenSea	I	UBE3C
cg09182986	0.000622361	7.47e-06	Island	II	CAP1;CAP1
cg18537677	0.0199185	7.58e-06	OpenSea	II
cg18885107	0.00131268	7.65e-06	OpenSea	I	POMGNT1;POMGNT1
cg10627206	0.00265866	7.76e-06	Island	II	EPOR
cg17382663	-0.0128109	7.81e-06	S_Shelf	I	EP400NL
cg16006965	-0.00664095	7.91e-06	OpenSea	II	GCET2;GCET2
cg05761971	0.028346	7.93e-06	OpenSea	II	FAM82A1;FAM82A1;FAM82A1;FAM82A1;FAM82A1;FAM82A1
cg12361290	0.00038899	8.16e-06	Island	I
cg21480966	0.0196289	8.54e-06	OpenSea	II	MYH15
cg22808175	0.000778793	8.68e-06	S_Shore	II	PHOSPHO1;PHOSPHO1
cg19415383	0.0178334	8.73e-06	OpenSea	II	DSG1
cg27482571	0.0176258	8.76e-06	OpenSea	II	GXYLT1;GXYLT1
cg04923194	0.01898	8.8e-06	OpenSea	II	DLG2;DLG2;DLG2;DLG2
cg07388756	0.0238276	9.03e-06	OpenSea	II
cg05295566	0.0181409	9.98e-06	N_Shore	II
cg07483065	0.0224804	1.02e-05	OpenSea	II
cg08908482	0.0212659	1.03e-05	OpenSea	II
cg07422619	0.00424963	1.04e-05	OpenSea	II
cg02293668	0.0156275	1.06e-05	N_Shore	II	CHRNB2
cg09901201	0.0145568	1.06e-05	OpenSea	II	SCP2;SCP2;SCP2;SCP2
cg14382224	0.0245211	1.06e-05	S_Shore	II	ASTN2;ASTN2;ASTN2
cg07312654	0.0167855	1.08e-05	Island	II	ADCY8
cg01419479	0.00108552	1.08e-05	Island	I	GLUL;GLUL;GLUL;GLUL;GLUL
cg02565255	0.00138018	1.11e-05	OpenSea	I
cg15688980	0.020138	1.15e-05	OpenSea	II
cg21823425	0.0169443	1.16e-05	OpenSea	II	TMEM225
cg01461770	0.0012843	1.16e-05	N_Shore	II
cg27486692	0.0184183	1.16e-05	OpenSea	II	GUCY2C
cg04144714	0.0201517	1.17e-05	OpenSea	II	LYST;MIR1537
cg10197846	0.0218465	1.18e-05	OpenSea	II
cg24067615	-0.0179853	1.23e-05	S_Shelf	II	ZNF101
cg01820962	0.0245543	1.23e-05	OpenSea	II	NT5DC1
cg20549659	0.0174225	1.24e-05	OpenSea	II
cg03173942	0.0233437	1.24e-05	OpenSea	II	RYBP

## Sheet: Table S5
Table S5. Unadjusted cell mixture results for HUVEC: top 100 differentially methylated CpG loci based on lowest P-value
CpG Name	Coefficient	P-value	Relation to CpG Island	Infinium Type	Gene Name
cg27175016	0.154328	3.26115e-06	OpenSea	I	SORCS2
cg05201145	0.141077	1.03499e-05	OpenSea	II	IQSEC3;IQSEC3
cg11933267	0.121301	1.82518e-05	OpenSea	II	PLA2G2F
cg18087902	-0.134284	1.84388e-05	N_Shore	II	MARCH10;MARCH10
cg06080831	-0.132744	2.26081e-05	Island	II
cg01870330	0.171796	2.42057e-05	Island	II
cg09435824	-0.0830289	2.65866e-05	Island	II	HSDL1;LRRC50;HSDL1
cg19440264	-0.13659	2.79038e-05	S_Shore	I	CHRNB1
cg21357088	0.124124	3.03338e-05	OpenSea	II
cg24127106	0.0895066	3.60149e-05	N_Shore	I	PRMT1;PRMT1;PRMT1
cg10024987	0.124653	4.87748e-05	S_Shore	II	SPIRE2
cg01431908	-0.101963	5.3344e-05	Island	II	C1orf190;POMGNT1
cg12747469	0.107306	5.60371e-05	S_Shore	II	CCDC108;CCDC108
cg01851378	0.102087	5.95549e-05	Island	II
cg18153213	-0.0757587	6.10415e-05	N_Shore	II	TOR3A
cg11076714	0.108085	6.19796e-05	N_Shelf	II	STAB1
cg24504831	0.0805646	6.26931e-05	S_Shelf	I
cg00090261	-0.0898185	6.32701e-05	Island	II	RGS22
cg03610867	-0.124146	6.34871e-05	Island	II	SHH
cg02092906	-0.0714163	6.53032e-05	Island	I	PGM3;RWDD2A
cg00490543	0.102729	7.22796e-05	OpenSea	II	HVCN1;HVCN1
cg06159435	-0.0996774	7.33131e-05	Island	I	H2AFX
cg08515841	-0.102068	7.35747e-05	N_Shore	II	KLF7
cg22991936	0.0813025	7.48965e-05	S_Shelf	I	AKT1;AKT1;AKT1
cg01294811	0.11179	7.56191e-05	OpenSea	II	NDUFS6
cg13054323	0.121498	7.58488e-05	N_Shore	II	WDR46;WDR46
cg16715692	-0.0668878	7.76189e-05	Island	I	GPX4;GPX4;GPX4
cg08007378	-0.102358	7.81315e-05	N_Shore	II	WHAMM
cg17256532	0.0740048	8.23715e-05	Island	I	GFRA1;GFRA1;GFRA1
cg21149548	-0.0474453	8.41676e-05	Island	I	UXS1
cg23367608	-0.0747101	9.06192e-05	Island	II	FAM162B
cg27247054	0.116112	0.000100867	S_Shelf	II
cg16109369	-0.0668071	0.000106563	Island	II	C6orf226;C6orf226
cg06620731	-0.0943813	0.000110147	S_Shore	II	FICD
cg08278440	-0.0891944	0.000111155	N_Shore	II
cg15899410	0.0689188	0.000114949	Island	I	UBE2Q2;UBE2Q2;UBE2Q2
cg12845432	0.140726	0.000115368	N_Shore	II	CD81
cg16121685	-0.0624021	0.000128001	Island	I	UHMK1
cg15415507	-0.0989295	0.000128848	Island	II	EPHA2;EPHA2
cg23087020	0.111123	0.000128879	Island	II	POU2F1
cg21002651	0.202541	0.000129725	OpenSea	II	CASP1;CASP1;CASP1;CASP1;CASP1
cg26634121	0.084255	0.000140225	N_Shore	I	GALNS
cg05100392	0.0968315	0.000140966	Island	II
cg21638108	-0.0688939	0.000147254	Island	I	KIAA0892;SF4
cg01231434	-0.0646656	0.000147977	Island	II	NDUFAB1
cg02151485	0.0859634	0.000152215	OpenSea	I	RAMP1
cg20615720	-0.0663352	0.000158459	S_Shelf	II	COX6B1;COX6B1
cg09938876	0.162466	0.000158708	OpenSea	II	UTS2;UTS2
cg13225427	0.106865	0.000162002	OpenSea	II	GSTZ1;GSTZ1;GSTZ1
cg23250157	-0.195019	0.000165374	OpenSea	II	SYNE2;SYNE2;SYNE2
cg00732538	-0.0978072	0.00016766	N_Shore	I	JPH3
cg20367082	-0.0857914	0.000167864	Island	II	MPRIP;MPRIP
cg08327532	-0.063087	0.000168397	Island	I	CHAT;CHAT;CHAT;CHAT;CHAT;CHAT;CHAT
cg08368938	-0.0861784	0.000176813	S_Shore	II	PDCD10;SERPINI1;SERPINI1;PDCD10;SERPINI1;PDCD10
cg19624873	-0.075874	0.000185108	OpenSea	I	SHISA4;SHISA4;SHISA4
cg19219624	-0.101859	0.000189323	Island	II	TAC1;TAC1;TAC1;TAC1
cg23996829	-0.0608878	0.00018947	OpenSea	I	NR5A2;NR5A2
cg02138756	-0.0754303	0.000191167	OpenSea	I	NINJ2
cg21069019	0.0989006	0.000194435	S_Shore	I
cg26520120	-0.0860439	0.000197367	Island	II	GBX1
cg09604203	-0.103051	0.000198296	Island	II	MYBL2
cg02225739	-0.0800351	0.000199235	Island	II	MLYCD
cg27283514	0.116162	0.000200477	OpenSea	II
cg14599440	0.104608	0.000202972	S_Shore	II	MPPE1
cg26152108	0.105047	0.00020556	S_Shelf	II	ATP11A;ATP11A
cg15490781	-0.0715096	0.000207498	Island	I	CRYBA2;CRYBA2;CRYBA2
cg04050068	0.150702	0.000210434	OpenSea	II	KRT79
cg11940285	-0.0606341	0.000212102	Island	I	TRH;TRH
cg10598434	0.142354	0.000213602	Island	I	ZBTB45
cg24286812	0.0661821	0.000213874	Island	I	CYP2W1
cg19528338	0.0806581	0.000216775	N_Shore	II	BMP2
cg25503559	-0.0816356	0.000217272	Island	II	MRPL24;MRPL24
cg25680245	-0.0785907	0.000217427	Island	I	ABHD3
cg23657718	0.0785832	0.000219448	S_Shore	I
cg03853134	-0.0709205	0.000221989	S_Shore	I	MKI67IP
cg26516954	-0.0922446	0.00022318	Island	II	B3GNTL1
cg22385579	0.118627	0.000229934	N_Shore	II
cg25427740	-0.0724301	0.00023126	Island	I	PCIF1
cg04414295	-0.104559	0.000240716	Island	I	WDR20;WDR20;HSP90AA1;WDR20;WDR20;WDR20
cg03713346	-0.0751136	0.000242796	Island	II	CPNE2
cg22787604	0.109612	0.00024349	N_Shore	II	DLGAP2
cg07039378	0.123241	0.000243849	OpenSea	I
cg08364607	0.125629	0.000244882	OpenSea	II	ATG2A
cg05494465	-0.0680399	0.000247996	S_Shore	I
cg21438062	-0.0756987	0.000249474	Island	II	RETSAT;ELMOD3;ELMOD3;RETSAT;ELMOD3;ELMOD3
cg18689253	-0.0747676	0.000254237	Island	II	TLE4
cg10369116	0.074255	0.000254707	N_Shore	II	KAZALD1
cg26477593	-0.0820258	0.000258073	Island	I	RCE1;RCE1;C11orf80
cg10620530	-0.0671938	0.000262394	Island	II	C9orf139;ABCA2;ABCA2;ABCA2
cg09036188	-0.106651	0.000263129	Island	I	CHRNE;C17orf107
cg13140464	0.113836	0.00026511	S_Shore	II	AP3B2
cg01054478	-0.083262	0.000265115	Island	I
cg23043780	-0.0781481	0.000268493	Island	II	BAIAP2L1
cg26623416	-0.0601722	0.000271964	Island	I	TSG101
cg08204027	0.163428	0.000275195	Island	II	ADAD2;ADAD2;ADAD2;ADAD2
cg07430085	0.119089	0.000281289	S_Shore	II	CDH24;CDH24
cg14422922	-0.10119	0.000282153	Island	II	OR2B11
cg03597968	0.170018	0.000282393	Island	II	KLHL36
cg14857596	-0.0630587	0.000285532	Island	I	TBC1D15;TBC1D15;TBC1D15;TBC1D15;TBC1D15;TBC1D15;TBC1D15
cg16898498	0.169658	0.000285895	OpenSea	II	RTP2

## Sheet: Table S6
Table S6. Adjusted cell mixture results for HUVEC: top 100 differentially methylated CpG loci based on lowest P-value
CpG Name	Coefficient	P-value	Relation to CpG Island	Infinium Type	Gene Name
cg21149548	-0.00050076	3.8571e-06	Island	I	UXS1
cg09435824	-0.00104483	1.12446e-05	Island	II	HSDL1;LRRC50;HSDL1
cg23250157	-0.0304876	1.26039e-05	OpenSea	II	SYNE2;SYNE2;SYNE2
cg27175016	0.0165799	1.86449e-05	OpenSea	I	SORCS2
cg00490543	0.0119813	2.14695e-05	OpenSea	II	HVCN1;HVCN1
cg12747469	0.0131797	3.13203e-05	S_Shore	II	CCDC108;CCDC108
cg02092906	-0.00138015	3.19608e-05	Island	I	PGM3;RWDD2A
cg18087902	-0.00175238	4.00666e-05	N_Shore	II	MARCH10;MARCH10
cg03635649	-0.00167699	4.05755e-05	S_Shore	II	PLCXD3
cg19528338	0.0125248	4.30767e-05	N_Shore	II	BMP2
cg01015871	0.0129549	5.06451e-05	OpenSea	II	MT4
cg06080831	-0.00107216	5.08258e-05	Island	II
cg01583915	0.00754042	6.46466e-05	N_Shore	II	C20orf46;C20orf46
cg17892871	-0.00234773	6.71942e-05	Island	I	TFPT;TFPT;PRPF31
cg14416311	-0.000905508	7.29708e-05	Island	I	GAS1
cg15279832	-0.0130476	7.46164e-05	OpenSea	II
cg05201145	0.00942087	7.63613e-05	OpenSea	II	IQSEC3;IQSEC3
cg14360405	-0.00861125	8.23479e-05	S_Shelf	II
cg20314490	0.00724348	9.17624e-05	S_Shore	II	NPTX2
cg06159435	-0.00164011	9.2194e-05	Island	I	H2AFX
cg10996014	-0.000418626	9.28771e-05	Island	I	RHOA;TCTA;TCTA
cg18153213	-0.000972289	9.80225e-05	N_Shore	II	TOR3A
cg05056638	-0.0181488	0.000106964	S_Shore	I
cg21638108	-0.00120176	0.000111245	Island	I	KIAA0892;SF4
cg05833851	-0.00293716	0.000111277	Island	II	CLYBL
cg22991936	0.00612925	0.000125456	S_Shelf	I	AKT1;AKT1;AKT1
cg20367082	-0.00103269	0.000131582	Island	II	MPRIP;MPRIP
cg27299616	-0.0105702	0.000137117	N_Shore	II	DYNC1H1
cg19787841	0.00416884	0.000137201	N_Shore	II	PCBP2;PCBP2;PCBP2;PCBP2;PCBP2;PCBP2;PCBP2
cg00090261	-0.00111057	0.000137496	Island	II	RGS22
cg08770580	-0.000735485	0.000138845	Island	I	ECE2;CAMK2N2;CAMK2N2
cg15890274	-0.000245523	0.000145945	Island	I	SNX32
cg04332287	-0.000437235	0.000151726	Island	I	ATP13A1
cg25808926	-0.000583278	0.000155381	Island	I	SAP18
cg20193104	-0.00109585	0.000155982	Island	I	BAT2
cg18564099	-0.00039658	0.000159185	Island	II	ELOVL5
cg16121685	-0.000819909	0.00016214	Island	I	UHMK1
cg19570574	-0.00116482	0.000170451	Island	II	THBS1
cg23791600	0.0136275	0.000179655	S_Shore	II
cg01822289	0.00335833	0.000180489	N_Shore	II	SLC22A11
cg08599824	0.0123246	0.000190462	OpenSea	II
cg25558663	-0.00862881	0.000191111	S_Shelf	I
cg14857596	-0.000614293	0.000191344	Island	I	TBC1D15;TBC1D15;TBC1D15;TBC1D15;TBC1D15;TBC1D15;TBC1D15
cg18457669	0.00691711	0.000197127	OpenSea	II
cg13223107	-0.0024292	0.000197524	Island	I	TFAP2B
cg21917512	-0.00998166	0.000199086	OpenSea	II
cg11933267	0.0102285	0.000216015	OpenSea	II	PLA2G2F
cg02147292	0.00442864	0.000223978	OpenSea	II	ADAMTS8
cg06951217	-0.000709465	0.000231193	OpenSea	I	DBT;DBT
cg21250978	-0.0165467	0.000232761	N_Shore	II	PRKAR2B
cg08576643	-0.000877859	0.000236293	S_Shore	I	FAM65B
cg01231434	-0.000484866	0.00023957	Island	II	NDUFAB1
cg08327532	-0.00113608	0.000239641	Island	I	CHAT;CHAT;CHAT;CHAT;CHAT;CHAT;CHAT
cg24127106	0.00909854	0.000251297	N_Shore	I	PRMT1;PRMT1;PRMT1
cg10806483	0.00769786	0.000252621	S_Shelf	II
cg11940285	-0.00219892	0.000254761	Island	I	TRH;TRH
cg19091756	-0.000341806	0.000273356	Island	I	TTLL3
cg22334665	-0.000846543	0.000275151	Island	II	SLC22A16
cg19627869	-0.000253752	0.000275871	OpenSea	II	SUOX;SUOX;SUOX;SUOX;SUOX;SUOX
cg12401918	-0.0034128	0.000279367	S_Shore	II	GPSM3;NOTCH4
cg25210936	-0.000897231	0.000286592	S_Shore	II	TMEM109
cg15756653	-0.00885292	0.000287109	OpenSea	II	SGCA;SGCA;SGCA;SGCA
cg10114279	-0.00322367	0.000290125	OpenSea	II
cg05922610	-0.0021726	0.000292321	Island	I	NR2E1
cg06863473	-0.00671875	0.000292338	N_Shore	II
cg21357088	0.0106085	0.000295237	OpenSea	II
cg03853134	-0.00953809	0.000296279	S_Shore	I	MKI67IP
cg03713346	-0.000709802	0.000296553	Island	II	CPNE2
cg14069619	0.011403	0.000298373	OpenSea	II	KRBA2
cg25503559	-0.000485338	0.000299629	Island	II	MRPL24;MRPL24
cg12726784	-0.000800679	0.000303203	Island	I	FAM189B;FAM189B;FAM189B;FAM189B
cg08007378	-0.0137825	0.000305363	N_Shore	II	WHAMM
cg27081603	-0.000655493	0.000306017	Island	II	KIAA1191;KIAA1191;KIAA1191
cg05009018	-0.00212815	0.000311796	OpenSea	I	CPA5;CPA5;CPA5
cg21915799	0.00261244	0.000313655	OpenSea	II	MSRA;MSRA;MSRA
cg04478905	-0.0141958	0.000316081	OpenSea	II	CLDN14;CLDN14
cg26120756	-0.00190613	0.000318488	N_Shore	II	TATDN1;TATDN1;TATDN1;NDUFB9
cg18395675	-0.00114649	0.000323706	Island	II
cg22086834	-0.0115703	0.000324018	OpenSea	II	SGCE;SGCE;SGCE
cg08119655	-0.00526202	0.00032836	OpenSea	II	PPFIBP2
cg08515841	-0.00698379	0.000329053	N_Shore	II	KLF7
cg13165261	-0.0146334	0.000332305	S_Shore	II
cg01759756	-0.0288863	0.000337645	OpenSea	II	C11orf80
cg16714002	-0.00322432	0.000346052	N_Shore	II
cg25710178	-0.000230641	0.000353235	Island	I	TEAD4;TEAD4;TEAD4
cg06894381	-0.00106224	0.00035501	Island	II	SLC35D1;SLC35D1
cg09889103	-0.00124953	0.000362884	Island	II	SAPS1
cg08079693	-0.00050641	0.000367245	Island	II	CHD6;CHD6
cg18689253	-0.000486122	0.000369489	Island	II	TLE4
cg02218260	-0.00209191	0.000371	S_Shore	II	GRM2;GRM2
cg13337731	-0.00987032	0.000372571	OpenSea	I	MLXIPL;MLXIPL;MLXIPL;MLXIPL
cg05973262	0.00917576	0.000374996	OpenSea	II	NOTCH4
cg23367608	-0.00125861	0.000377256	Island	II	FAM162B
cg22515636	-0.000674503	0.00038535	N_Shore	II
cg05494465	-0.00161509	0.0003876	S_Shore	I
cg14199723	-0.00544078	0.000397358	Island	II	PLEC1;PARP10
cg15278699	0.005807	0.000398982	N_Shore	II	PWWP2B;PWWP2B
cg02917128	-0.00246938	0.000399249	N_Shore	II
cg09513209	-0.000270274	0.000400366	Island	I	ITGB4;ITGB4;ITGB4;ITGB4
cg09942741	-0.000249182	0.000400607	Island	I	CALM2

## Sheet: Table S7
Table S7. Permutation based P-values for the assocation of DNA methylation of KEGG biological pathways and prenatal arsenic exposure in artery, placenta and HUVEC
		Artery Tissue			Placenta Tissue			HUVEC Tissue
KEGG Entry ID	KEGG Biological Pathway Name	Mean F-statistic P-value	Max F-statistic P-value		Mean F-statistic P-value	Max F-statistic P-value		Mean F-statistic P-value	Max F-statistic P-value
Any KEGG Pathway		0.009	0.006		0.108	0.004		0.129	0.06
Any Gene within Pathway		0.009	0.002		0.111	0.008		0.126	0.138
hsa02010	ABC transporters	0.004	0.021		0.109	0.008		0.135	0.321
hsa03010	Ribosome	0.017	0.019		0.042	0.116		0.096	0.203
hsa03018	RNA degradation	0.023	0.031		0.061	0.062		0.093	0.261
hsa03020	RNA polymerase	0.007	0.002		0.117	0.143		0.14	0.499
hsa03022	Basal transcription factors	0.02	0.089		0.094	0.255		0.081	0.069
hsa03030	DNA replication	0.01	<0.001		0.069	0.039		0.11	0.538
hsa03040	Spliceosome	0.023	0.017		0.033	0.082		0.086	0.005
hsa03050	Proteasome	0.016	0.08		0.078	0.114		0.086	0.806
hsa03060	Protein export	0.027	0.047		0.107	0.197		0.07	0.143
hsa03320	PPAR signaling pathway	0.007	0.054		0.188	0.228		0.141	0.188
hsa03410	Base excision repair	0.008	0.047		0.131	0.078		0.126	0.729
hsa03420	Nucleotide excision repair	0.013	0.002		0.081	0.076		0.132	0.713
hsa03430	Mismatch repair	0.018	0.045		0.145	0.277		0.101	0.629
hsa03440	Homologous recombination	0.02	0.046		0.086	0.314		0.124	0.449
hsa03450	Non-homologous end-joining	0.027	0.072		0.114	0.024		0.048	0.14
hsa04010	MAPK signaling pathway	0.008	0.029		0.123	0.066		0.148	0.834
hsa04012	ErbB signaling pathway	0.01	0.025		0.113	0.023		0.136	0.76
hsa04020	Calcium signaling pathway	0.005	0.012		0.168	<0.001		0.178	0.801
hsa04060	Cytokine-cytokine receptor interaction	0.012	0.053		0.179	0.365		0.138	0.387
hsa04062	Chemokine signaling pathway	0.01	0.064		0.126	0.001		0.171	0.121
hsa04080	Neuroactive ligand-receptor interaction	0.006	0.002		0.182	<0.001		0.147	0.689
hsa04110	Cell cycle	0.015	0.024		0.044	0.239		0.136	0.455
hsa04114	Oocyte meiosis	0.015	0.101		0.116	<0.001		0.092	0.444
hsa04115	p53 signaling pathway	0.01	<0.001		0.13	0.196		0.159	0.288
hsa04120	Ubiquitin mediated proteolysis	0.015	0.059		0.061	0.015		0.097	0.163
hsa04130	SNARE interactions in vesicular transport	0.01	0.009		0.149	0.095		0.152	0.326
hsa04140	Regulation of autophagy	0.011	0.06		0.043	0.01		0.053	0.473
hsa04142	Lysosome	0.007	0.026		0.151	0.011		0.128	0.223
hsa04144	Endocytosis	0.008	0.046		0.086	0.019		0.135	0.127
hsa04146	Peroxisome	0.01	0.074		0.064	<0.001		0.083	0.292
hsa04150	mTOR signaling pathway	0.006	0.121		0.054	0.012		0.129	0.262
hsa04210	Apoptosis	0.011	0.007		0.161	0.226		0.108	0.655
hsa04260	Cardiac muscle contraction	0.011	0.002		0.091	0.016		0.107	0.484
hsa04270	Vascular smooth muscle contraction	0.008	0.005		0.124	<0.001		0.148	0.307
hsa04310	Wnt signaling pathway	0.009	<0.001		0.148	0.156		0.154	0.002
hsa04320	Dorso-ventral axis formation	0.008	0.009		0.203	0.006		0.183	0.599
hsa04330	Notch signaling pathway	0.005	0.01		0.093	0.052		0.196	0.521
hsa04340	Hedgehog signaling pathway	0.008	<0.001		0.144	0.197		0.114	0.004
hsa04350	TGF-beta signaling pathway	0.015	0.097		0.122	0.016		0.101	0.081
hsa04360	Axon guidance	0.009	0.021		0.181	0.05		0.149	0.786
hsa04370	VEGF signaling pathway	0.009	0.058		0.157	0.018		0.161	0.697
hsa04510	Focal adhesion	0.008	0.006		0.151	0.057		0.182	0.267
hsa04512	ECM-receptor interaction	0.006	0.096		0.166	0.208		0.228	0.582
hsa04514	Cell adhesion molecules (CAMs)	0.012	0.031		0.348	0.019		0.168	0.518
hsa04520	Adherens junction	0.016	0.031		0.094	0.012		0.157	0.123
hsa04530	Tight junction	0.012	0.004		0.089	0.052		0.152	0.18
hsa04540	Gap junction	0.011	0.068		0.13	<0.001		0.118	0.869
hsa04610	Complement and coagulation cascades	0.016	0.164		0.383	0.312		0.2	0.763
hsa04612	Antigen processing and presentation	0.005	0.042		0.139	0.036		0.126	0.425
hsa04614	Renin-angiotensin system	0.007	0.141		0.308	0.037		0.186	0.51
hsa04620	Toll-like receptor signaling pathway	0.016	0.037		0.09	0.012		0.101	0.634
hsa04621	NOD-like receptor signaling pathway	0.02	0.146		0.118	0.007		0.136	0.067
hsa04622	RIG-I-like receptor signaling pathway	0.013	0.001		0.065	0.063		0.1	0.658
hsa04623	Cytosolic DNA-sensing pathway	0.012	0.005		0.092	0.085		0.122	0.036
hsa04630	Jak-STAT signaling pathway	0.013	0.061		0.133	0.243		0.124	0.153
hsa04640	Hematopoietic cell lineage	0.011	0.062		0.332	0.04		0.194	0.586
hsa04650	Natural killer cell mediated cytotoxicity	0.007	0.089		0.257	0.022		0.15	0.454
hsa04660	T cell receptor signaling pathway	0.009	0.06		0.182	0.029		0.16	0.451
hsa04662	B cell receptor signaling pathway	0.012	0.054		0.195	0.022		0.152	0.687
hsa04664	Fc epsilon RI signaling pathway	0.011	0.05		0.223	0.017		0.176	0.643
hsa04666	Fc gamma R-mediated phagocytosis	0.012	0.065		0.187	0.024		0.145	0.215
hsa04670	Leukocyte transendothelial migration	0.008	0.003		0.155	0.051		0.181	0.138
hsa04672	Intestinal immune network for IgA production	0.006	0.146		0.301	0.103		0.123	0.531
hsa04710	Circadian rhythm - mammal	0.01	0.076		0.094	0.051		0.21	0.69
hsa04720	Long-term potentiation	0.009	0.029		0.123	0.024		0.112	0.505
hsa04722	Neurotrophin signaling pathway	0.009	0.039		0.131	0.028		0.132	0.486
hsa04730	Long-term depression	0.013	0.051		0.243	0.017		0.132	0.502
hsa04740	Olfactory transduction	0.033	0.077		0.15	0.129		0.123	0.055
hsa04742	Taste transduction	0.007	0.045		0.234	0.054		0.299	0.949
hsa04810	Regulation of actin cytoskeleton	0.008	0.005		0.173	0.038		0.162	0.779
hsa04910	Insulin signaling pathway	0.005	0.02		0.09	0.03		0.189	0.002
hsa04912	GnRH signaling pathway	0.008	0.061		0.147	<0.001		0.141	0.618
hsa04914	Progesterone-mediated oocyte maturation	0.01	0.021		0.08	<0.001		0.15	0.826
hsa04916	Melanogenesis	0.008	<0.001		0.219	<0.001		0.17	0.002
hsa04920	Adipocytokine signaling pathway	0.009	0.003		0.181	0.54		0.162	0.114
hsa04930	Type II diabetes mellitus	0.006	0.038		0.045	0.024		0.252	0.383
hsa04940	Type I diabetes mellitus	0.005	0.023		0.167	0.047		0.105	0.416
hsa04950	Maturity onset diabetes of the young	0.004	0.007		0.084	0.025		0.237	0.096
hsa04960	Aldosterone-regulated sodium reabsorption	0.008	0.087		0.1	0.014		0.126	0.462
hsa04962	Vasopressin-regulated water reabsorption	0.017	0.089		0.124	<0.001		0.133	0.449
hsa04964	Proximal tubule bicarbonate reclamation	0.005	0.054		0.167	0.274		0.11	0.561
hsa04966	Collecting duct acid secretion	0.005	0.01		0.123	0.017		0.186	0.582
hsa05010	Alzheimer's disease	0.012	0.004		0.065	0.019		0.096	0.32
hsa05012	Parkinson's disease	0.015	0.003		0.089	0.01		0.086	0.209
hsa05014	Amyotrophic lateral sclerosis (ALS)	0.01	0.002		0.052	0.204		0.09	0.09
hsa05016	Huntington's disease	0.013	0.036		0.055	0.013		0.098	0.33
hsa05020	Prion diseases	0.01	0.006		0.235	0.005		0.11	0.168
hsa05110	Vibrio cholerae infection	0.004	0.075		0.106	<0.001		0.179	0.773
hsa05120	Epithelial cell signaling in Helicobacter pylori infection	0.015	0.033		0.063	0.03		0.103	0.753
hsa05130	Pathogenic Escherichia coli infection	0.01	0.191		0.063	0.068		0.105	0.09
hsa05140	Leishmania infection	0.011	0.307		0.31	0.014		0.107	0.648
hsa05200	Pathways in cancer	0.01	0.001		0.113	0.005		0.13	0.011
hsa05210	Colorectal cancer	0.017	0.012		0.069	0.012		0.121	0.091
hsa05211	Renal cell carcinoma	0.01	0.036		0.056	0.002		0.098	0.645
hsa05212	Pancreatic cancer	0.017	0.009		0.091	0.01		0.144	0.113
hsa05213	Endometrial cancer	0.017	0.046		0.081	0.013		0.12	0.082
hsa05214	Glioma	0.01	0.051		0.126	0.014		0.149	0.334
hsa05215	Prostate cancer	0.017	0.065		0.131	0.012		0.127	0.12
hsa05216	Thyroid cancer	0.008	0.016		0.092	0.009		0.135	0.045
hsa05217	Basal cell carcinoma	0.009	<0.001		0.119	0.084		0.156	0.002
hsa05218	Melanoma	0.016	0.017		0.154	0.016		0.12	0.332
hsa05219	Bladder cancer	0.009	0.028		0.079	0.004		0.226	0.692
hsa05220	Chronic myeloid leukemia	0.01	0.03		0.071	0.01		0.156	0.729
hsa05221	Acute myeloid leukemia	0.01	0.041		0.175	0.013		0.126	0.115
hsa05222	Small cell lung cancer	0.019	0.008		0.095	0.105		0.112	0.34
hsa05223	Non-small cell lung cancer	0.014	0.048		0.094	0.01		0.15	0.468
hsa05310	Asthma	0.006	0.247		0.804	0.372		0.118	0.36
hsa05320	Autoimmune thyroid disease	0.005	0.045		0.575	0.492		0.123	0.522
hsa05322	Systemic lupus erythematosus	0.022	0.01		0.134	0.051		0.099	0.29
hsa05330	Allograft rejection	0.004	0.042		0.673	0.422		0.117	0.482
hsa05332	Graft-versus-host disease	0.006	0.042		0.528	0.43		0.118	0.475
hsa05340	Primary immunodeficiency	0.004	0.015		0.089	0.02		0.197	0.18
hsa05410	Hypertrophic cardiomyopathy (HCM)	0.009	0.001		0.125	0.253		0.158	0.566
hsa05412	Arrhythmogenic right ventricular cardiomyopathy (ARVC)	0.019	0.151		0.113	0.274		0.139	0.134
hsa05414	Dilated cardiomyopathy	0.008	0.003		0.137	<0.001		0.154	0.609
hsa05416	Viral myocarditis	0.009	0.026		0.255	0.044		0.147	0.78
